# Supplementary material for: Carbapenem-Resistant Klebsiella pneumoniae in COVID-19 Era—Challenges and Solutions
Source: MDPI journal article supplement (doi:10.3390/antibiotics12081285), 2023-08-04
Supplement: s1 [file s1]

**Table S1 Distribution of patients with carbapenem-resistant *Klebsiella pneumoniae* during the COVID-19 pandemic to age categories**

| <b>Age groups</b> | <b>All patients /<br/>COVID-19 positive (n)</b> | <b>Males:<br/>All / COVID-19 positive (n)</b> | <b>Females:<br/>All / COVID-19 positive (n)</b> |
|-------------------|-------------------------------------------------|-----------------------------------------------|-------------------------------------------------|
| <b>0-5</b>        | 1 / 0                                           | 0 / 0                                         | 1 / 0                                           |
| <b>6-17</b>       | 0                                               | 0                                             | 0                                               |
| <b>18-49</b>      | 14 / 4                                          | 8 / 3                                         | 6 / 1                                           |
| <b>50-64</b>      | 28 / 16                                         | 17 / 10                                       | 11 / 6                                          |
| <b>≥65</b>        | 52 / 24                                         | 31 / 14                                       | 21 / 10                                         |
