# Supplementary material for: Carbapenem-Resistant Klebsiella pneumoniae in COVID-19 Era—Challenges and Solutions
Source: MDPI journal article supplement (doi:10.3390/antibiotics12081285), 2023-08-04
Supplement: s1 [file s1]

**Table S5 Virulence factor genes in sequenced *Klebsiella pneumoniae* strains**

[illegible]
