# Supplementary material for: Carbapenem-Resistant Klebsiella pneumoniae in COVID-19 Era—Challenges and Solutions
Source: MDPI journal article supplement (doi:10.3390/antibiotics12081285), 2023-08-04
Supplement: s1 [file s1]

**Table S2 Patients infected with carbapenem-resistant *Klebsiella pneumoniae* during the COVID-19 pandemic**

|                                                               | All patients / COVID-19 positive |             |           |
|---------------------------------------------------------------|----------------------------------|-------------|-----------|
|                                                               | Males (n)                        | Females (n) | Total (n) |
| <b>All CRKP-positive patients (2020-2022)</b>                 | 48 / 28                          | 47 / 17     | 95 / 45   |
| <b>Patients in intensive care</b>                             | 34 / 22                          | 24 / 16     | 58 / 38   |
| <b>Patients on APV</b>                                        | 30 / 19                          | 18 / 15     | 48 / 34   |
| <b>Patients with CRKP-caused VAP</b>                          | 30 / 19                          | 18 / 15     | 48 / 34   |
| <b>CRKP bloodstream invasion in patients with pneumonia</b>   | 3 / 3                            | 3 / 3       | 6 / 6     |
| <b>In-hospital mortality – all patients in intensive care</b> | 29 / 19                          | 18 / 14     | 47 / 33   |
| <b>In-hospital mortality - patients with CRKP-caused VAP</b>  | 18 / 12                          | 13 / 12     | 31 / 24   |

*CRKP – carbapenem-resistant Klebsiella pneumoniae, APV - artificial pulmonary ventilation; VAP – ventilator-associated pneumonia*
