# Supplementary material for: Carbapenem-Resistant Klebsiella pneumoniae in COVID-19 Era—Challenges and Solutions
Source: MDPI journal article supplement (doi:10.3390/antibiotics12081285), 2023-08-04
Supplement: s1 [file s1]

**Table S3 Taxonomic characterization of sequenced *Klebsiella pneumoniae* strains**

| Strain | Alternative name | Sublineage | Clonal group | ST   | Serotype (wzi) <sup>1</sup> | MLST id |
|--------|------------------|------------|--------------|------|-----------------------------|---------|
| 6      | KMB-1239         | SL10716    | CG11340      | 5889 | K14/15:O3 (new)             | 57228   |
| 5      | KMB-1238         | SL307      | CG307        | 307  | K2:O1/2 (173)               | 57227   |
| 7      | KMB-1240         | SL307      | CG307        | 307  | K2:O1/2 (173)               | 57229   |
| 9      | KMB-1242         | SL307      | CG307        | 307  | K2:O1/2 (173)               | 57231   |
| 4      | KMB-1237         | SL307      | CG307        | 307  | K2:O1/2 (173)               | 57226   |
| 13     | KMB-1246         | SL307      | CG307        | 307  | K2:O1/2 (173)               | 57235   |
| 2      | KMB-1235         | SL307      | CG307        | 307  | K2:O1/2 (173)               | 57224   |
| 1      | KMB-1234         | SL258      | CG3666       | 11   | ? (24)                      | 57223   |
| 3      | KMB-1236         | SL258      | CG340        | 11   | K15:O4 (50)                 | 57225   |
| 8      | KMB-1241         | SL258      | CG340        | 11   | K15:O4 (50)                 | 57230   |
| 10     | KMB-1243         | SL258      | CG340        | 11   | K15:O4 (50)                 | 57232   |
| 12     | KMB-1245         | SL258      | CG340        | 11   | K15:O4 (50)                 | 57234   |

<sup>1</sup> Serotype determined according to K-PAM (wzi gene allele number)
