# Supplementary material for: Carbapenem-Resistant Klebsiella pneumoniae in COVID-19 Era—Challenges and Solutions
Source: MDPI journal article supplement (doi:10.3390/antibiotics12081285), 2023-08-04
Supplement: s1 [file s1]

**Table S4 Genes encoding antibiotic resistance in sequenced *Klebsiella pneumoniae* strains**

|        |      | Aminoglycosides |       |             |           |            |            |             |       | Bleomycine |         |          |       |        |        |       |       |       | Betalactams | Trimetoprim | Sulfonamids |      | Phosphomycine | Chloramphenicol |        | Chloramfenikol/<br>florfenickol | Chinolones | Rifampin | Eflux pumps |      |      |        |        | Q amonium com | Tetracyclines |        |
|--------|------|-----------------|-------|-------------|-----------|------------|------------|-------------|-------|------------|---------|----------|-------|--------|--------|-------|-------|-------|-------------|-------------|-------------|------|---------------|-----------------|--------|---------------------------------|------------|----------|-------------|------|------|--------|--------|---------------|---------------|--------|
| Strain | MLST | AadA2           | Arr-2 | APH(3'')-Ib | APH(6)-Id | AAC(3)-IIa | AAC(6')-Ib | AAC(6')-Ib4 | RmtF1 | Ble-MBL    | TEM-156 | CTX-M-15 | SHV-1 | SHV-11 | SHV-28 | TEM-1 | OXA-1 | KPC-2 | NDM-1       | DfrA12      | Sul1        | Sul2 | FosA          | CatB            | CatB3* | FloR                            | Mph(A)     | QnrB1    | Arr-2       | OqxA | OqxB | OqxB19 | OqxB20 | OqxB25        | QacE delta    | Tet(A) |
| 6      | 5889 |                 |       |             |           |            |            |             |       |            |         |          | +     |        |        |       |       | +     |             |             |             |      | +             |                 |        |                                 |            |          |             |      |      |        | +      |               |               |        |
| 5      | 307  |                 |       | +           | +         | +          |            |             |       |            |         | +        |       |        | +      | +     | +     | +     |             |             |             | +    |               | +               |        |                                 |            | +        |             | +    |      |        | +      |               |               | +      |
| 7      | 307  |                 |       | +           | +         | +          |            |             |       |            |         | +        |       |        | +      | +     | +     | +     |             |             |             | +    | +             | +               |        |                                 |            | +        |             | +    |      | +      |        |               |               | +      |
| 9      | 307  |                 |       | +           | +         | +          |            |             |       |            |         | +        |       |        | +      | +     | +     | +     |             |             |             | +    | +             |                 | +      |                                 |            | +        |             | +    |      | +      |        |               |               | +      |
| 4      | 307  |                 |       | +           | +         | +          |            |             |       |            |         | +        |       |        | +      | +     | +     | +     |             |             |             | +    | +             |                 | +      |                                 |            | +        |             | +    |      | +      |        |               |               | +      |
| 13     | 307  |                 |       | +           | +         | +          |            |             |       |            |         | +        |       |        | +      | +     | +     | +     |             |             |             | +    | +             |                 | +      |                                 |            | +        |             | +    |      | +      |        |               |               | +      |
| 2      | 307  |                 |       | +           | +         | +          |            |             |       |            |         | +        |       |        | +      | +     | +     | +     |             |             |             | +    | +             |                 | +      |                                 |            | +        |             | +    |      | +      |        |               |               | +      |
| 1      | 11   |                 |       |             |           |            |            |             |       | +          |         |          |       | +      |        | +     |       |       | +           |             |             | +    | +             |                 |        | +                               | +          |          |             | +    |      |        | +      |               |               |        |
| 3      | 11   | +               |       |             |           |            | +          |             | +     | +          |         |          |       | +      |        |       |       |       | +           | +           | +           |      | +             | +               |        | +                               | +          |          |             | +    | +    |        |        |               | +             |        |
| 8      | 11   | +               |       |             |           | +          |            | +           | +     | +          |         | +        |       | +      |        |       | +     |       | +           | +           | +           |      | +             | +               |        |                                 |            |          | +           | +    | +    |        |        |               | +             |        |
| 10     | 11   | +               |       |             |           | +          |            |             | +     | +          |         | +        |       | +      |        |       | +     |       | +           | +           | +           |      | +             | +               |        |                                 |            |          | +           | +    | +    |        |        |               | +             |        |
| 12     | 11   |                 | +     |             |           |            | +          |             | +     | +          |         |          |       | +      |        |       |       |       | +           |             |             |      | +             | +               |        |                                 |            |          |             | +    | +    |        |        |               |               |        |
